# Supplementary material for: Mycobacterial Mutants with Defective Control of Phagosomal Acidification
Source: PubMed Central journal article supplement (PMC1291353; doi:10.1371/journal.ppat.0010033), 2005-11-25
Supplement: ppat.0010033.sg001.pdf [file ppat.0010033.sg001.pdf]

Supplementary Fig1A

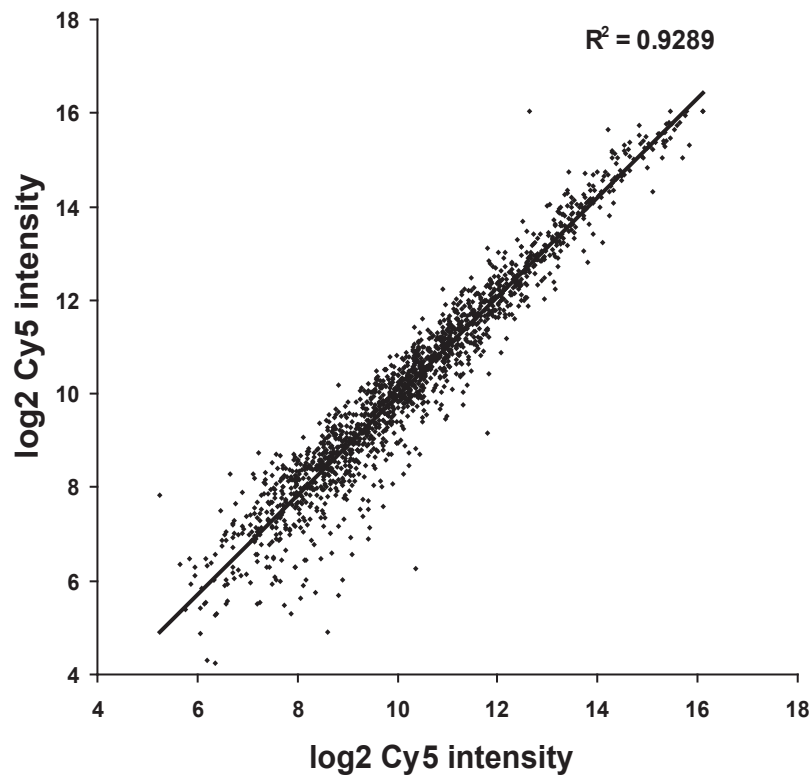

Supplementary Fig1B

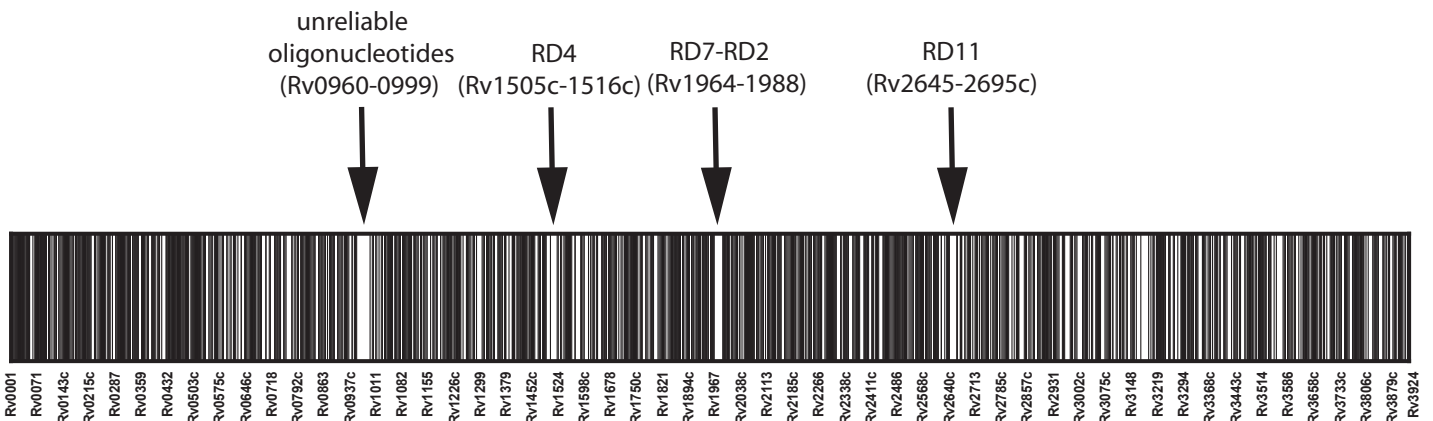

**Supplementary Figure 1A.** Reproducibility of the TSM labelling and hybridisation. Hybridisation signal intensities were compared from two independent labelling and hybridisation operations on a 2500-clone EZ::TNhyg insertion library. A strong correlation was observed ( $R^2=0.9289$ ).

**Supplementary Figure 1B.** Genome-wide distribution of transposon insertions in a pool of 2500 *M. bovis* BCG EZ::TNhyg mutants revealed by PCR-based TSM using an *M. tuberculosis* H37Rv microarray. The horizontal bar represents the genome of H37Rv with mutagenised genes represented as vertical black lines. Three of the BCG deletion regions are arrowed along with a region of defective oligonucleotide probes which do not efficiently hybridise target DNAs.
