# Supplementary material for: Mycobacterial Mutants with Defective Control of Phagosomal Acidification
Source: PubMed Central journal article supplement (PMC1291353; doi:10.1371/journal.ppat.0010033), 2005-11-25

Figure S2. Mutants with defects in the inhibition of phagosome pH are no more probable to have reduced intracellular fitness than those in a random mutant library. (A) Distribution of intracellular fitness values (fitness ratio, FR) in the acid phagosome mutants. Mean =0.146, 95% confidence interval =  $\pm 0.223$  (B) Distribution of intracellular fitness values in the whole transposon library. Mean 0.024, 95% confidence interval =  $\pm 0.042$ . □□

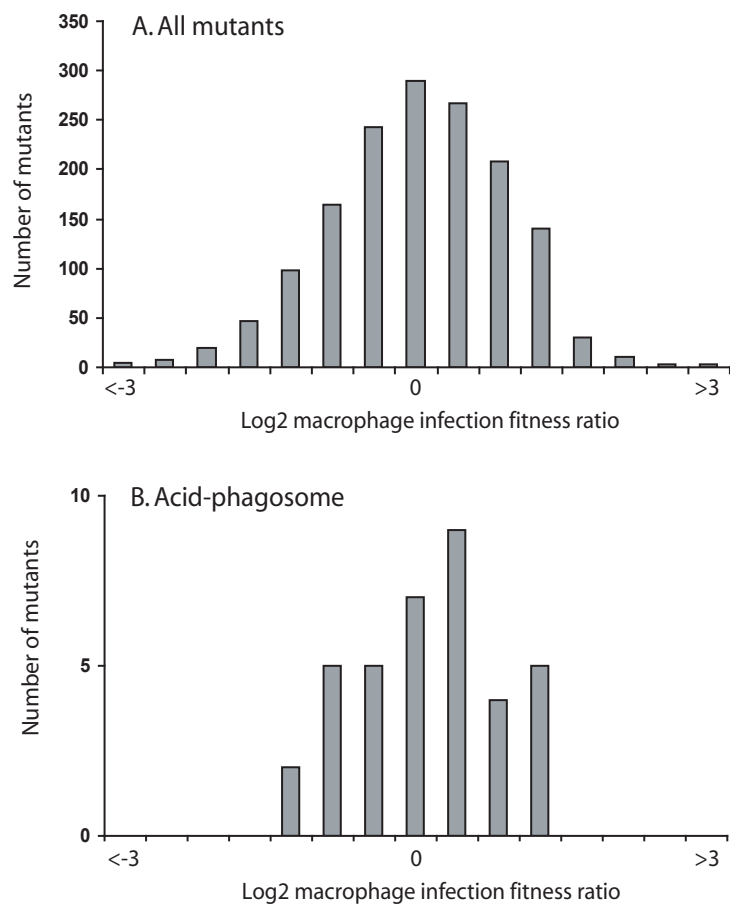

Supplement: ppat.0010033.sg002.pdf [file ppat.0010033.sg002.pdf]
