# Supplementary material for: Mycobacterial Mutants with Defective Control of Phagosomal Acidification
Source: PLoS Pathog. 2005 Nov 25;1(3):e33. doi: 10.1371/journal.ppat.0010033 (PMC1291353; doi:10.1371/journal.ppat.0010033)
Supplement: Table S1 — (21 KB XLS) [file ppat.0010033.st001.xls]

## Sheet: Sheet1
Table S1. Ez::TNhyg insertion sites
Ez::TNhyg insertion sites						M.tuberculosis H37Rv gene/M.bovis gene
CAGGTGCTGGAAGCCTTGATCCCGGCGGTCATC						Rv0142 Mb0147
GCAATACGCCAAGTCCAGCGCCGATCTCGCACG						Rv0200 Mb0206
TCGACCTGTCTGGCGTGTCGCACCGGCTGGCCG						Rv0359 Mb0366
CTACCGGGGTTCGGGTTGCCTGAGTCCAGGCCG						Rv0442c Mb0450c
CCCAGACCATCAGCTCGACCCCGTCGTAAGCCA						Rv0498 Mb0509
TTGCGGTAGGCGGGCAGCCGGTTGGTCTGCGGA						Rv0554 Mb0569
GCACCTGACGCTCGCACTACCGCTGTAATGTCT						Rv1093 Mb1123
GCGCCGTGCCCTGGTCTTGGCGGTGCTGGTCGG						Rv1249c Mb1281c
CCGACCACAGCGAGCAACAATACTGAGACGGTC						Rv1490 Mb1527
GAAGTTTGTCTTGGCGGTCCACGGAACCCGCGG						Rv1526c Mb1553c
GATCGAGGCGATGTTGAGCACCGCACCGGCGCC						Rv1544 Mb1571
GTGCCGTGCGACGGCCGCACCCCACTGTGCGCC						Rv1639c Mb1666c
GTGGGCTACCGCGCCTCGGTGCCTACACCGACG						Rv1794-95 Mb1822-23
GGACTTGTAGGACGGTACGTCGAGCTTGGTCGC						Rv1915 Mb1950
GTTCGTCGCCGAGCATCGAGCCCGGTTCGAGGT						Rv2024c-25c Mb2049c-50c
GGCGCTCGCGCTGCCCTCGGCGGGCCGCGACCA						Rv2161c Mb2185c
AAGCAGCGACCTTGCAAGCCTACCGCCCGGCCA						Rv2209 Mb2232c
CGCCGACAGGGCGTATAACACATGACGGCCTGG						Rv2270 Mb2293
CCTGCTGGACAGCGGCGACATTGGCGCGGCCGG						Rv2298 Mb2320
TGGCAGTCAGTGGGTCGGCCCCATCACCAACTT						Rv2301 Mb2323
AACGTACAGCGCTGCCCTGGCCGCAGAAGAGTG						Rv2331A Mb2359
AGTCGGGCTATATGTTTCATTCAGACGAGAGGC						Rv2457c-58 Mb2484c-2485
TCCCGGTCCTGGATCCGGATGAGGTCTGCTTCG						Rv2506 Mb2534
AAGTCCCACGGCCCCCAAGGCACCGTAATGCGC						Rv2940 Mb2965c
GACGCCGCGAACGCCCCAAGCAAAGCGGCGATC						Rv3236c Mb3264c
TCCGTGCGGCGGGGACATCGAAGCTGAGATGTG						Rv3373 Mb3408
CGATGTCCACCAGCACCACTGCGCTGAGCAATG						Rv3473c Mb3502c
GCCGCCGACTCCGCTCTGGCCCGACCAGCTCGG						Rv3707c Mb3734c
TTCCCGCGCGAGGGTCTGGCCGGGTCGCGGAAT						Rv3746c Mb3772c
AGCGACCGGCAGTGTGAAGTCCATCGCCGTCGG						Rv3759c Mb3785c
NNNNNNNNNNNNGgNcNNNNCNNNNNNNgNNNN						Consensus (>50% in lower case, >60% in upper case)
